# Supplementary material for: Cu1.5Mn1.5O4spinel: a novel anode material for lithium-ion batteries
Source: Royal Society of Chemistry journal article supplement (doi:10.1039/c6ra08308k), 2016-01-01

## Supplementary data

**Fig.S1.** SEM images of SD700 electrode (a, c) and SD700 electrode after 60 cycles (b, d).

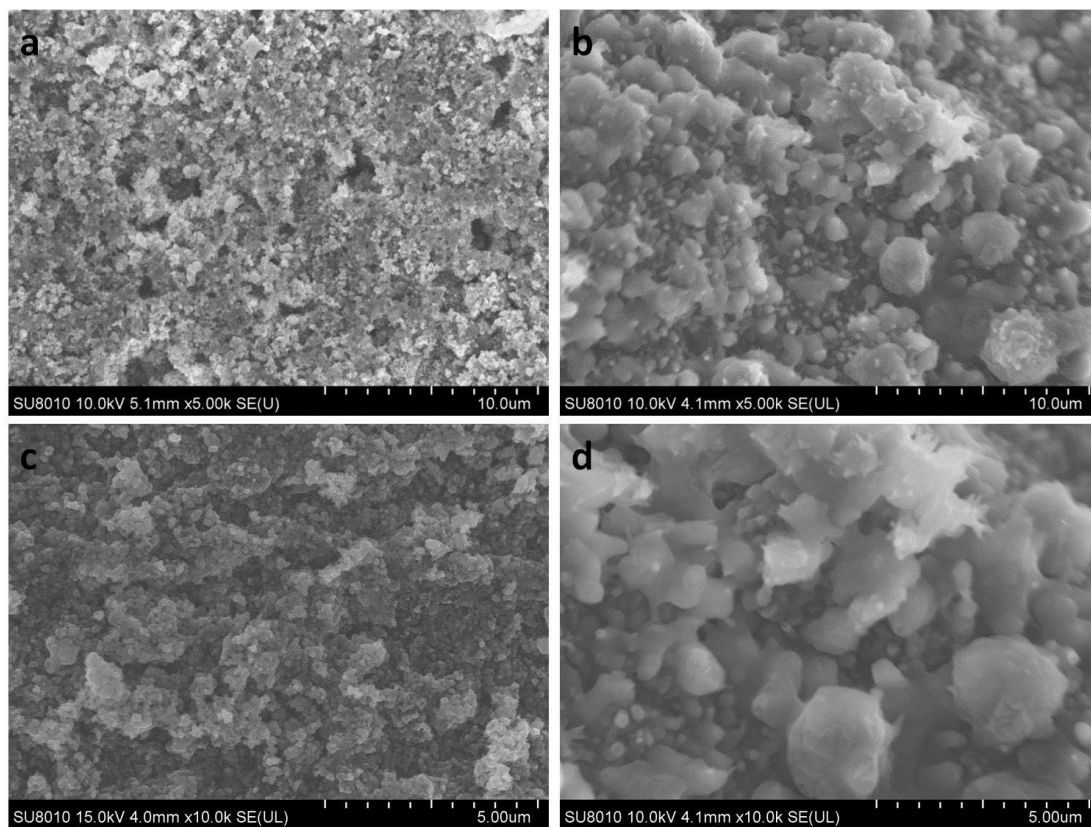

**Fig. S2.** XRD patterns of sample synthesized at different temperature.

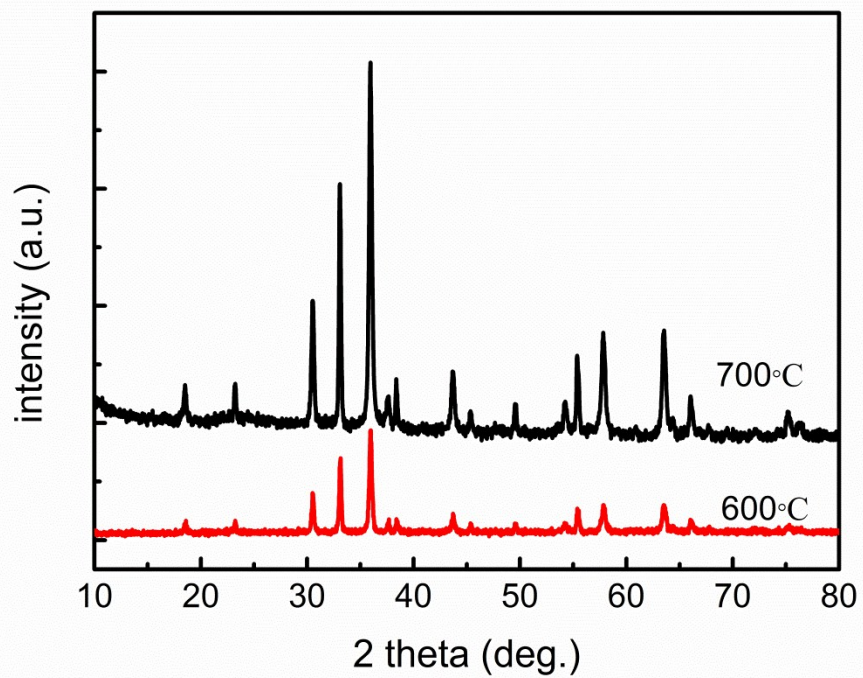

**Fig. S3.** Cycling performance of the sample obtained at 600 °C in the voltage range of 0.01-3.0 V vs. Li/Li<sup>+</sup> at current densities of 100 mA g<sup>-1</sup>.

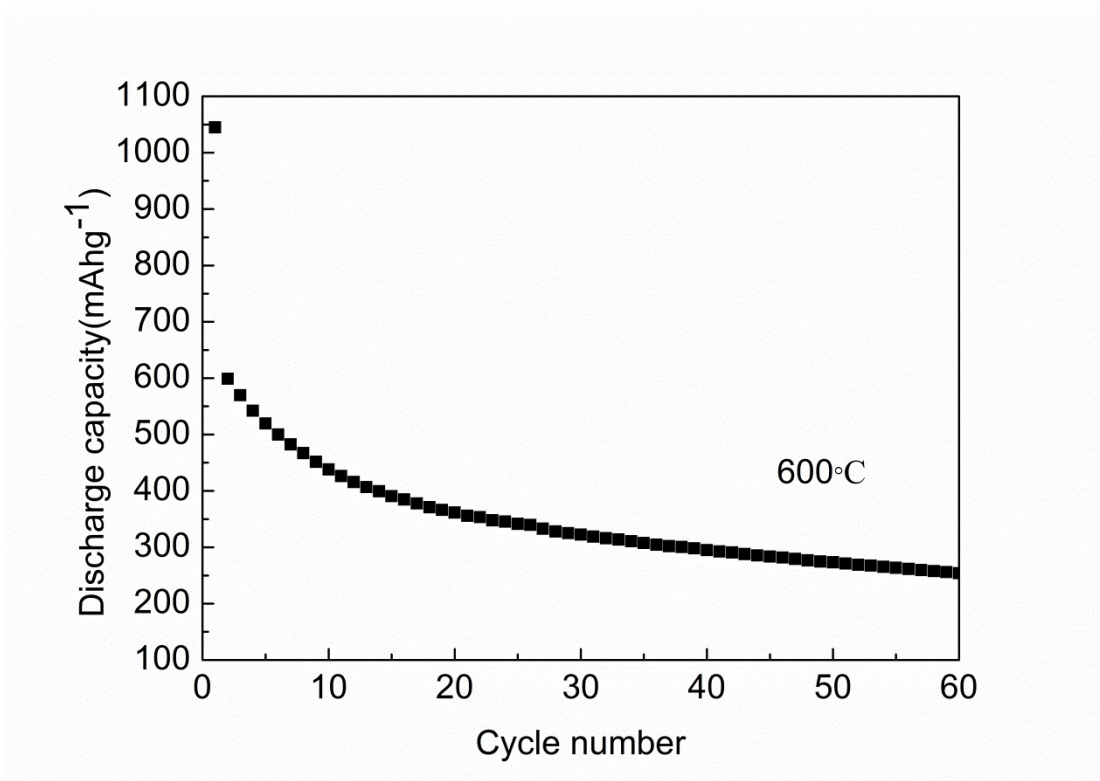

Supplement: c6ra08308k1.pdf [file c6ra08308k1.pdf]
